# Supplementary material for: Developing accurate molecular mechanics force fields for conjugated molecular systems
Source: Royal Society of Chemistry journal article supplement (doi:10.1039/c5cp04328j), 2015-01-01
Supplement: c5cp04328j1.pdf [file c5cp04328j1.pdf]

## Supporting Information

### Developing accurate molecular mechanics force fields for conjugated molecular systems

Hainam Do and Alessandro Troisi

*Department of Chemistry and Centre for Scientific Computing, University of  
Warwick, Coventry CV4 7AL, United Kingdom*

This supporting information contains the force fields optimized as described in the main paper in the format suitable as direct CHARMM style input for NAMD package [*J. Comp. Chem.* **2005**, *26*, 1781-1802]. For each of the 4 molecules considered we report a “Topology” and a “Parameter” text file. Comments are included for clarification where necessary. The definition of atom type is given in Figures 1, 5, 6, 8 of the manuscript.

#### 1. DPP force field parameters

##### Topology

```
MASS 1 TC1 12.01100
MASS 2 TC2 12.01100
MASS 3 TC3 12.01100
MASS 4 TN1 14.00700
MASS 5 TO1 15.99940
MASS 6 TH0 1.00800
MASS 7 THN 1.00800
```

```
RESI LIG      0.000
GROUP      ! CHARGE
ATOM C1  TC2  0.199
ATOM C2  TC1 -0.048
ATOM C3  TC1 -0.048
ATOM C4  TC3  0.545
ATOM C5  TC3  0.545
ATOM C6  TC2  0.199
ATOM N1  TN1 -0.577
ATOM N2  TN1 -0.577
ATOM O1  TO1 -0.567
ATOM O2  TO1 -0.567
ATOM H1  TH0  0.099
ATOM H2  TH0  0.099
ATOM H3  THN  0.349
ATOM H4  THN  0.349
BOND C1  H1
BOND C1  C2
BOND C1  N2
BOND C2  C5
BOND C2  C3
BOND C3  C6
```

BOND C3 C4  
BOND C4 N2  
BOND C4 O2  
BOND C5 O1  
BOND C5 N1  
BOND C6 N1  
BOND C6 H2  
BOND N1 H3  
BOND N2 H4

## Parameters

### BONDS

!

$V(\text{bond}) = K_b(b - b_0)^{**2}$

! b0: A

!

!atom type Kb b0

TC2 TH0 417.464 1.08479

TC1 TC2 497.299 1.36559

TC2 TN1 370.198 1.36848

TC1 TC3 284.281 1.46818

TC1 TC1 315.603 1.46055

TC3 TN1 187.424 1.42808

TC3 TO1 695.901 1.21586

THN TN1 528.533 1.01283

### ANGLES

!

$V(\text{angle}) = K_{\theta}(\theta - \theta_0)^{**2}$

!

!Ktheta: kcal/mole/rad\*\*2

!Theta0: degrees

!

!atom types Ktheta Theta0

!

TC2 TN1 THN 32.7552 110.611

TC2 TN1 TC3 99.2878 106.824

TC1 TC1 TC2 71.5491 97.8672

TC2 TC1 TC3 25.8204 109.812

TC1 TC3 TN1 75.8123 118.318

TC1 TC3 TO1 42.5578 161.498

TC1 TC1 TC3 85.7704 101.731

TC1 TC2 TN1 78.5709 109.891

TC1 TC2 TH0 24.9797 137.467

TC3 TN1 THN 36.3281 110.746

TH0 TC2 TN1 35.7191 124.586

TN1 TC3 TO1 76.5397 140.004

### DIHEDRALS

!

$V(\text{dihedral}) = K_{\chi}(1 + \cos(n(\chi) - \delta))$

!

!Kchi: kcal/mole

!n: multiplicity

!delta: degrees

!

!atom types Kchi n delta

TC2 TN1 TC3 TC1 3.10314 2 180

TC2 TN1 TC3 TO1 2.54922 2 180

```

TC2 TC1 TC3 TO1 0.319137 2 180
TC2 TC1 TC3 TN1 0.64949 2 180
TC2 TC1 TC1 TC2 4.10166 2 180
TC2 TC1 TC1 TC3 5.70044 2 180
TC1 TC3 TN1 THN 1.35102 2 180
TC1 TC1 TC2 TN1 14.533 2 180
TC1 TC1 TC2 TH0 4.79933 2 180
TC1 TC1 TC3 TN1 9.88997 2 180
TC1 TC1 TC3 TO1 1.49564 2 180
TC1 TC2 TN1 TC3 6.70496 2 180
TC1 TC2 TN1 THN 3.13263 2 180
TC3 TN1 TC2 TH0 1.56721 2 180
TC3 TC1 TC1 TC3 7.52617 2 180
TC3 TC1 TC2 TN1 2.67995 2 180
TC3 TC1 TC2 TH0 1.0909 2 180
TO1 TC3 TN1 THN 1.34065 2 180
TH0 TC2 TN1 THN 0.567993 2 180

```

#### NONBONDED

```

!
!V(Lennard-Jones) = Eps,i,j[(Rmin,i,j/ri,j)**12 - !2(Rmin,i,j/ri,j)**6]
!
!epsilon: kcal/mole, Eps,i,j = sqrt(eps,i * eps,j)
!Rmin/2: A, Rmin,i,j = Rmin/2,i + Rmin/2,j
!
!atom ignored epsilon Rmin/2 ignored !eps,1-4 Rmin/2,1-4
!
!the 1-4 scaling factor is 0.5
TC1 0.0 -0.07 2.00 0.0 -0.035 1.00
TC2 0.0 -0.07 2.00 0.0 -0.035 1.00
TC3 0.0 -0.105 2.10 0.0 -0.0525 1.05
TN1 0.0 -0.17 1.82 0.0 -0.085 0.91
TO1 0.0 -0.21 1.66 0.0 -0.015 0.83
TH0 0.0 -0.03 1.36 0.0 -0.015 0.68
THN 0.0 0 0 0.0 0 0

```

## 2. DCV-SN5 force field parameters

### Topology

```

MASS 1 TS1 32.06000
MASS 2 TS2 32.06000
MASS 3 TS3 32.06000
MASS 4 TC1 12.01100
MASS 5 TC2 12.01100
MASS 6 TC3 12.01100
MASS 7 TC4 12.01100
MASS 8 TC5 12.01100
MASS 9 TC6 12.01100
MASS 10 TC7 12.01100
MASS 11 TC8 12.01100
MASS 12 TN1 14.00700
MASS 13 TN2 14.00700
MASS 14 TH1 1.008000
MASS 15 TH2 1.008000
MASS 16 TH3 1.008000

RESI LIG 0.000

```

| GROUP    |     | !charge   |
|----------|-----|-----------|
| ATOM S1  | TS1 | 0.080     |
| ATOM S2  | TS2 | 0.029     |
| ATOM S3  | TS2 | 0.029     |
| ATOM C1  | TC1 | -0.168    |
| ATOM C2  | TC1 | 0.194     |
| ATOM C3  | TC2 | 0.054     |
| ATOM C4  | TC4 | -0.151    |
| ATOM C5  | TC1 | -0.167    |
| ATOM C6  | TC2 | 0.055     |
| ATOM C7  | TC2 | -0.116    |
| ATOM C8  | TC5 | 0.083     |
| ATOM C9  | TC3 | -0.070    |
| ATOM C10 | TC6 | -0.231    |
| ATOM C11 | TC7 | 0.464     |
| ATOM C12 | TC7 | 0.389     |
| ATOM C13 | TC1 | 0.193     |
| ATOM C14 | TC2 | -0.116    |
| ATOM C15 | TC3 | -0.070    |
| ATOM C16 | TC5 | 0.082     |
| ATOM C17 | TC7 | 0.464     |
| ATOM C18 | TC4 | -0.151    |
| ATOM C19 | TC6 | -0.231    |
| ATOM C20 | TC7 | 0.389     |
| ATOM C21 | TC8 | 0.364     |
| ATOM C22 | TC8 | 0.178     |
| ATOM N1  | TN1 | -0.136    |
| ATOM N2  | TN1 | -0.135    |
| ATOM N3  | TN2 | -0.448    |
| ATOM N4  | TN2 | -0.459    |
| ATOM N5  | TN2 | -0.459    |
| ATOM N6  | TN2 | -0.448    |
| ATOM H1  | TH1 | 0.102     |
| ATOM H2  | TH2 | 0.153     |
| ATOM H3  | TH2 | 0.153     |
| ATOM H4  | TH1 | 0.102     |
| ATOM H5  | TH3 | -0.000167 |
| ATOM H6  | TH3 | -0.000167 |
| ATOM H7  | TH3 | -0.000167 |
| ATOM H8  | TH3 | -0.000167 |
| ATOM H9  | TH3 | -0.000167 |
| ATOM H10 | TH3 | -0.000167 |

|          |     |
|----------|-----|
| BOND H7  | C21 |
| BOND H10 | C22 |
| BOND C21 | H5  |
| BOND C21 | N2  |
| BOND C21 | H6  |
| BOND N5  | C11 |
| BOND C11 | C10 |
| BOND N6  | C12 |
| BOND C12 | C10 |
| BOND C10 | C8  |
| BOND C8  | H1  |
| BOND C8  | C4  |
| BOND S2  | C4  |
| BOND S2  | C2  |
| BOND C4  | C9  |
| BOND C9  | C7  |
| BOND C9  | H2  |

BOND C2 C7  
 BOND C2 C1  
 BOND C7 N1  
 BOND N1 C6  
 BOND N1 C22  
 BOND C1 C6  
 BOND C1 S1  
 BOND C6 C3  
 BOND S1 C5  
 BOND C3 C5  
 BOND C3 N2  
 BOND C5 C13  
 BOND H3 C15  
 BOND N2 C14  
 BOND C14 C13  
 BOND C14 C15  
 BOND C13 S3  
 BOND C15 C18  
 BOND C18 S3  
 BOND C18 C16  
 BOND H4 C16  
 BOND C16 C19  
 BOND H8 C22  
 BOND C19 C20  
 BOND C19 C17  
 BOND C20 N3  
 BOND C17 N4  
 BOND C22 H9

## Parameters

### BONDS

!

!V(bond) = Kb(b - b0)\*\*2

!

!Kb: kcal/mole/A\*\*2

!b0: A

!

| !atom | type | Kb      | b0      |
|-------|------|---------|---------|
| TC1   | TS1  | 224.615 | 1.75983 |
| TC4   | TS2  | 176.728 | 1.76622 |
| TC1   | TS2  | 232.414 | 1.74496 |
| TC1   | TC2  | 368.499 | 1.41454 |
| TC1   | TC1  | 405.219 | 1.39889 |
| TC2   | TN1  | 354.177 | 1.38777 |
| TC3   | TC4  | 431.495 | 1.38702 |
| TC2   | TC2  | 323.37  | 1.40606 |
| TC5   | TH1  | 381.647 | 1.08662 |
| TC4   | TC5  | 364.115 | 1.39766 |
| TC2   | TC3  | 413.581 | 1.39431 |
| TC3   | TH2  | 394.265 | 1.08454 |
| TC5   | TC6  | 488.292 | 1.36018 |
| TC6   | TC7  | 366.499 | 1.43769 |
| TC7   | TN2  | 1351.92 | 1.16677 |
| TC8   | TH3  | 368.169 | 1.09659 |
| TC8   | TN1  | 297.682 | 1.44694 |

### ANGLES

!

!V(angle) = Ktheta(Theta - Theta0)\*\*2

!  
!Ktheta: kcal/mole/rad\*\*2  
!Theta0: degrees  
!

| l   | atom types | Ktheta  | Theta0  | Kub | S0 |
|-----|------------|---------|---------|-----|----|
| TC1 | TC1 TS1    | 31.7676 | 126.39  |     |    |
| TC2 | TC1 TS1    | 47.4843 | 107.75  |     |    |
| TC3 | TC4 TS2    | 60.9772 | 112.8   |     |    |
| TC1 | TC1 TS2    | 31.9917 | 126.908 |     |    |
| TC2 | TC1 TS2    | 50.5453 | 106.409 |     |    |
| TC5 | TC4 TS2    | 39.5982 | 115.748 |     |    |
| TC1 | TC2 TC2    | 62.4797 | 109.582 |     |    |
| TC1 | TS1 TC1    | 132.534 | 89.7307 |     |    |
| TC1 | TC2 TN1    | 71.36   | 111.432 |     |    |
| TC1 | TC1 TC2    | 65.0759 | 103.054 |     |    |
| TC2 | TN1 TC2    | 97.0388 | 108.348 |     |    |
| TC4 | TC3 TH2    | 31.1449 | 123.609 |     |    |
| TC2 | TC3 TC4    | 77.1903 | 111.497 |     |    |
| TC1 | TS2 TC4    | 136.637 | 90.7595 |     |    |
| TC2 | TN1 TC8    | 44.9065 | 113.677 |     |    |
| TC2 | TC2 TN1    | 30.0028 | 119.151 |     |    |
| TC2 | TC3 TH2    | 27.1007 | 129.984 |     |    |
| TC3 | TC4 TC5    | 32.673  | 121.082 |     |    |
| TC3 | TC2 TN1    | 40.7723 | 127.1   |     |    |
| TC1 | TC2 TC3    | 48.5252 | 109.171 |     |    |
| TC4 | TC5 TC6    | 47.9589 | 123.977 |     |    |
| TC6 | TC5 TH1    | 30.0306 | 122.557 |     |    |
| TC5 | TC6 TC7    | 45.2637 | 124.811 |     |    |
| TC7 | TC6 TC7    | 41.9202 | 130.469 |     |    |
| TC4 | TC5 TH1    | 35.6697 | 120.985 |     |    |
| TC6 | TC7 TN2    | 28.7751 | 180.229 |     |    |
| TH3 | TC8 TN1    | 55.3581 | 106.534 |     |    |
| TH3 | TC8 TH3    | 37.8774 | 104.933 |     |    |

DIHEDRALS

!  
!V(dihedral) = Kchi(1 + cos(n(chi) - delta))  
!

!Kchi: kcal/mole  
!n: multiplicity  
!delta: degrees  
!

| l   | atom types  | Kchi       | n | delta |
|-----|-------------|------------|---|-------|
| TS1 | TC1 TC2 TC2 | -0.0422196 | 2 | 180   |

! Note: as a result of unconstrained optimization  
! some of the barriers are negative. However as they  
! minimize the objective function and they yield the correct  
! equilibrium structure no attempt has been made to constrain the  
! optimization to allow only for positive values of the barriers.

|     |             |          |   |     |
|-----|-------------|----------|---|-----|
| TS1 | TC1 TC2 TN1 | 3.63918  | 2 | 180 |
| TS1 | TC1 TC1 TC2 | 2.9836   | 2 | 180 |
| TS1 | TC1 TC1 TS2 | 0.350206 | 2 | 180 |
| TS2 | TC4 TC5 TC6 | 2.39079  | 2 | 180 |
| TS2 | TC4 TC5 TH1 | 2.55571  | 2 | 180 |
| TS2 | TC4 TC3 TC2 | 6.06218  | 2 | 180 |
| TS2 | TC4 TC3 TH2 | 4.49626  | 2 | 180 |
| TS2 | TC1 TC2 TC3 | 0.742171 | 2 | 180 |
| TS2 | TC1 TC2 TN1 | 4.13913  | 2 | 180 |
| TS2 | TC1 TC1 TC2 | 3.15349  | 2 | 180 |
| TC1 | TC2 TN1 TC2 | 11.2497  | 2 | 180 |

TC1 TC2 TN1 TC8 2.27189 2 180  
 TC1 TC2 TC2 TC1 11.007 2 180  
 TC1 TC2 TC2 TN1 2.2599 2 180  
 TC1 TC1 TS2 TC4 1.82118 2 180  
 TC1 TC1 TC2 TC3 1.99541 2 180  
 TC1 TC1 TC2 TN1 -3.7535 2 180  
 TC1 TS1 TC1 TC2 8.85275 2 180  
 TC1 TS1 TC1 TC1 0.910099 2 180  
 TC1 TC2 TC3 TC4 8.7376 2 180  
 TC1 TC2 TC3 TH2 1.99403 2 180  
 TC1 TC1 TC2 TC2 2.55825 2 180  
 TC1 TS2 TC4 TC5 1.34991 2 180  
 TC1 TS2 TC4 TC3 5.07937 2 180  
 TC2 TN1 TC8 TH3 0.25441 3 -1.39723  
 TC2 TN1 TC2 TC3 1.5887 2 180  
 TC2 TC2 TN1 TC2 2.2869 2 180  
 TC2 TC2 TN1 TC8 0.982143 2 180  
 TC2 TC1 TC1 TC2 23.1518 2 180  
 TC4 TC3 TC2 TN1 1.85504 2 180  
 TC4 TC5 TC6 TC7 4.29107 2 180  
 TC4 TS2 TC1 TC2 11.1712 2 180  
 TC2 TC3 TC4 TC5 4.0153 2 180  
 TC5 TC6 TC7 TN2 0 2 180  
 TC5 TC4 TC3 TH2 2.00934 2 180  
 TC3 TC2 TN1 TC8 1.40286 2 180  
 TC3 TC4 TC5 TC6 1.6609 2 180  
 TC3 TC4 TC5 TH1 1.69211 2 180  
 TC7 TC6 TC7 TN2 0 2 180  
 TC7 TC6 TC5 TH1 4.86382 2 180  
 TN1 TC2 TC3 TH2 0.449405 2 180  
 TN1 TC2 TC2 TN1 0.297761 2 180

NONBONDED

!  
 !V(Lennard-Jones) = Eps,i,j[(Rmin,i,j/ri,j)\*\*12 - !2(Rmin,i,j/ri,j)\*\*6]  
 !

!epsilon: kcal/mole, Eps,i,j = sqrt(eps,i \* eps,j)

!Rmin/2: A, Rmin,i,j = Rmin/2,i + Rmin/2,j

!

| !atom | ignored | epsilon | Rmin/2 | ignored | !eps,1-4 | Rmin/2,1-4 |
|-------|---------|---------|--------|---------|----------|------------|
| TS1   | 0.0     | -0.450  | 2.00   | 0.0     | -0.450   | 2.00       |
| TS2   | 0.0     | -0.450  | 2.00   | 0.0     | -0.450   | 2.00       |
| TS3   | 0.0     | -0.450  | 2.00   | 0.0     | -0.450   | 2.00       |
| TC1   | 0.0     | -0.050  | 2.10   | 0.0     | -0.050   | 2.10       |
| TC2   | 0.0     | -0.050  | 2.10   | 0.0     | -0.050   | 2.10       |
| TC3   | 0.0     | -0.050  | 2.10   | 0.0     | -0.050   | 2.10       |
| TC4   | 0.0     | -0.050  | 2.10   | 0.0     | -0.050   | 2.10       |
| TC5   | 0.0     | -0.068  | 2.10   | 0.0     | -0.068   | 2.10       |
| TC6   | 0.0     | -0.068  | 2.10   | 0.0     | -0.068   | 2.10       |
| TC7   | 0.0     | -0.180  | 1.87   | 0.0     | -0.180   | 1.87       |
| TC8   | 0.0     | -0.180  | 1.87   | 0.0     | -0.180   | 1.87       |
| TN1   | 0.0     | -0.200  | 1.85   | 0.0     | -0.200   | 1.85       |
| TN2   | 0.0     | -0.180  | 1.79   | 0.0     | -0.180   | 1.79       |
| TH1   | 0.0     | -0.031  | 1.15   | 0.0     | -0.031   | 1.15       |
| TH2   | 0.0     | -0.030  | 1.36   | 0.0     | -0.030   | 1.36       |
| TH3   | 0.0     | -0.024  | 1.34   | 0.0     | -0.024   | 1.34       |

### 3. TT-DPP force field parameters

#### Topology

MASS 1 TC1 12.01100  
MASS 2 TC2 12.01100  
MASS 3 TC3 12.01100  
MASS 4 TN1 14.00700  
MASS 5 TO1 15.99940  
MASS 6 TH0 1.00800  
MASS 7 THN 1.00800  
MASS 8 TC4 12.01100  
MASS 9 TC5 12.01100  
MASS 10 TC6 12.01100  
MASS 11 TS1 32.06000  
MASS 12 TH1 1.00800  
MASS 13 TC7 12.01100  
MASS 14 TC8 12.01100  
MASS 15 TS2 32.06000  
MASS 16 TH2 1.00800

RESI LIG 0.000000  
GROUP !charge  
ATOM C1 TC2 0.331  
ATOM C2 TC1 -0.293  
ATOM C3 TC1 -0.296  
ATOM C4 TC3 0.628  
ATOM C5 TC3 0.627  
ATOM C6 TC2 0.320  
ATOM C7 TC4 -0.076  
ATOM C8 TC5 -0.211  
ATOM C9 TC6 0.114  
ATOM C10 TC6 0.073  
ATOM C11 TC5 -0.193  
ATOM C12 TC4 0.029  
ATOM C13 TC7 0.088  
ATOM C14 TC8 -0.097  
ATOM C15 TC8 -0.247  
ATOM C16 TC7 0.197  
ATOM S1 TS1 -0.028  
ATOM S2 TS1 -0.134  
ATOM S3 TS2 -0.108  
ATOM N1 TN1 -0.321  
ATOM N2 TN1 -0.316  
ATOM O1 TO1 -0.512  
ATOM O2 TO1 -0.511  
ATOM H1 THN 0.07075  
ATOM H2 THN 0.07075  
ATOM H3 TH1 0.204  
ATOM H4 TH1 0.188  
ATOM H5 TH2 0.133  
ATOM H6 TH2 0.128  
ATOM H7 TH0 0.07075  
ATOM H8 TH0 0.07075  
BOND C1 C2  
BOND C1 H8  
BOND C1 N1  
BOND C2 C5  
BOND C2 C3

BOND C3 C6  
 BOND C3 C4  
 BOND C4 N1  
 BOND C4 O1  
 BOND C5 O2  
 BOND C5 N2  
 BOND C6 N2  
 BOND C6 C7  
 BOND C7 C8  
 BOND C7 S1  
 BOND C8 H3  
 BOND C8 C9  
 BOND C9 S2  
 BOND C9 C10  
 BOND C10 C11  
 BOND C10 S1  
 BOND C11 C12  
 BOND C11 H4  
 BOND C12 S2  
 BOND C12 C13  
 BOND C13 C14  
 BOND C13 S3  
 BOND C14 H5  
 BOND C14 C15  
 BOND C15 H6  
 BOND C15 C16  
 BOND C16 H7  
 BOND C16 S3  
 BOND H1 N1  
 BOND H2 N2

## Parameters

BONDS

!

!V(bond) = Kb(b - b0)\*\*2

!

!Kb: kcal/mole/A\*\*2

!b0: A

!

| !atom | type | Kb      | b0      |
|-------|------|---------|---------|
| TC1   | TC2  | 462.428 | 1.38376 |
| TC2   | TH0  | 408.126 | 1.08566 |
| TC2   | TN1  | 365.66  | 1.40591 |
| TC1   | TC3  | 307.142 | 1.4532  |
| TC1   | TC1  | 341.975 | 1.43538 |
| TC3   | TN1  | 258.892 | 1.43731 |
| TC3   | TO1  | 886.222 | 1.22342 |
| THN   | TN1  | 519.648 | 1.01316 |
| TC4   | TC5  | 436.509 | 1.37214 |
| TC4   | TS1  | 191.683 | 1.76643 |
| TC5   | TH1  | 392.521 | 1.08593 |
| TC5   | TC6  | 415.234 | 1.40202 |
| TC6   | TS1  | 233.715 | 1.77597 |
| TC6   | TC6  | 390.622 | 1.41989 |
| TC7   | TC8  | 493.72  | 1.37181 |
| TC7   | TS2  | 222.187 | 1.77177 |
| TC8   | TH2  | 406.366 | 1.08631 |
| TC8   | TC8  | 399.442 | 1.40561 |

TC7 TH0 419.988 1.08384  
TC2 TC4 397.84 1.42593  
TC4 TC7 370.55 1.44347

#### ANGLES

!  
!V(angle) = Ktheta(Theta - Theta0)\*\*2

!  
!Ktheta: kcal/mole/rad\*\*2  
!Theta0: degrees

!  
!atom types Ktheta Theta0  
TC2 TN1 THN 32.9237 111.121  
TC2 TN1 TC3 108.483 106.5  
TC1 TC1 TC2 72.6315 98.834  
TC2 TC1 TC3 29.7981 121.557  
TC1 TC3 TN1 53.9075 115.105  
TC1 TC3 TO1 45.2576 161.291  
TC1 TC1 TC3 86.2002 96.5999  
TC1 TC2 TN1 78.8412 114.618  
TC1 TC2 TH0 27.5459 142.424  
TC3 TN1 THN 36.4292 108.802  
TN1 TC3 TO1 79.8939 140.655  
TH0 TC2 TN1 38.8457 130.099  
TC4 TS1 TC6 134.281 92.1637  
TC4 TC5 TC6 67.1088 105.489  
TC4 TC5 TH1 28.5958 123.195  
TC5 TC6 TC6 63.534 107.465  
TC5 TC6 TS1 32.4342 124.245  
TC5 TC4 TS1 61.1379 114.127  
TC6 TC6 TS1 59.2837 111.839  
TC6 TC5 TH1 31.3249 126.581  
TC7 TS2 TC7 134.544 92.9507  
TC8 TC8 TC7 75.101 106.522  
TC7 TC8 TH2 27.194 127.513  
TC8 TC8 TH2 34.5566 127.935  
TC8 TC7 TS2 64.6152 108.671  
TC8 TC7 TH0 25.4598 122.76  
TS2 TC7 TH0 30.3333 116.251  
TC1 TC2 TC4 38.6123 144.882  
TC2 TC4 TS1 43.9721 129.805  
TC2 TC4 TC5 42.2152 137.832  
TC4 TC2 TN1 55.589 135.146  
TC5 TC4 TC7 40.3289 134.938  
TC4 TC7 TS2 40.4437 133.306  
TC4 TC7 TC8 40.0968 128.561  
TC7 TC4 TS1 45.0858 135.8

#### DIHEDRALS

!  
!V(dihedral) = Kchi(1 + cos(n(chi) - delta))

!  
!Kchi: kcal/mole  
!n: multiplicity  
!delta: degrees

!  
!atom types Kchi n delta  
!--flexible dihedral  
TC2 TN1 TC3 TC1 13.0417 2 180  
TC2 TN1 TC3 TO1 1.85497 2 180

|                 |     |     |     |           |         |     |
|-----------------|-----|-----|-----|-----------|---------|-----|
| TC2             | TC1 | TC3 | TO1 | 0.040975  | 2       | 180 |
| TC2             | TC1 | TC3 | TN1 | 2.00381   | 2       | 180 |
| TC2             | TC1 | TC1 | TC2 | 1.20238   | 2       | 180 |
| TC2             | TC1 | TC1 | TC3 | 14.8586   | 2       | 180 |
| TC1             | TC3 | TN1 | THN | 2.3407    | 2       | 180 |
| TC1             | TC1 | TC2 | TN1 | 8.52045   | 2       | 180 |
| TC1             | TC1 | TC3 | TN1 | 0.847911  | 2       | 180 |
| TC1             | TC1 | TC3 | TO1 | 2.74125   | 2       | 180 |
| TC1             | TC2 | TN1 | TC3 | 5.0478    | 2       | 180 |
| TC1             | TC2 | TN1 | THN | 2.74687   | 2       | 180 |
| TC1             | TC1 | TC2 | TH0 | 3.43317   | 2       | 180 |
| TC3             | TN1 | TC2 | TH0 | 1.67092   | 2       | 180 |
| TC3             | TC1 | TC1 | TC3 | 9.52619   | 2       | 180 |
| TC3             | TC1 | TC2 | TN1 | 0.940196  | 2       | 180 |
| TC3             | TC1 | TC2 | TH0 | 0.755843  | 2       | 180 |
| TO1             | TC3 | TN1 | THN | 1.59168   | 2       | 180 |
| TH0             | TC2 | TN1 | THN | 0.537781  | 2       | 180 |
| TC4             | TS1 | TC6 | TC6 | 20.9015   | 2       | 180 |
| TC4             | TS1 | TC6 | TC5 | -0.218884 | 2       | 180 |
| TC4             | TC5 | TC6 | TS1 | 1.97818   | 2       | 180 |
| TC4             | TC5 | TC6 | TC6 | 14.2749   | 2       | 180 |
| TC5             | TC6 | TC6 | TC5 | 6.22734   | 2       | 180 |
| TC5             | TC6 | TC6 | TS1 | -4.26608  | 2       | 180 |
| TC5             | TC4 | TS1 | TC6 | -0.92275  | 2       | 180 |
| TC6             | TC6 | TC5 | TH1 | 2.38607   | 2       | 180 |
| TC6             | TC5 | TC4 | TS1 | 9.20688   | 2       | 180 |
| TS1             | TC6 | TC6 | TS1 | 6.27352   | 2       | 180 |
| TS1             | TC6 | TC5 | TH1 | 0.883429  | 2       | 180 |
| TS1             | TC4 | TC5 | TH1 | 4.53256   | 2       | 180 |
| TC8             | TC7 | TS2 | TC7 | 14.4311   | 2       | 180 |
| TC7             | TC8 | TC8 | TC7 | 14.0441   | 2       | 180 |
| TC8             | TC8 | TC7 | TS2 | 0.470613  | 2       | 180 |
| TC7             | TC8 | TC8 | TH2 | 0.7393    | 2       | 180 |
| TC8             | TC8 | TC7 | TH0 | 4.48206   | 2       | 180 |
| TS2             | TC7 | TC8 | TH2 | 4.83507   | 2       | 180 |
| TH2             | TC8 | TC8 | TH2 | 1.04619   | 2       | 180 |
| TH2             | TC8 | TC7 | TH0 | 1.9927    | 2       | 180 |
| TH0             | TC7 | TS2 | TC7 | 1.97718   | 2       | 180 |
| TC1             | TC1 | TC2 | TC4 | 4.41276   | 2       | 180 |
| TC3             | TC1 | TC2 | TC4 | 1.18358   | 2       | 180 |
| TC3             | TN1 | TC2 | TC4 | 0.730651  | 2       | 180 |
| TC4             | TC2 | TN1 | THN | 0.0220463 | 2       | 180 |
| TC2             | TC4 | TC5 | TH1 | 1.07054   | 2       | 180 |
| TC2             | TC4 | TC5 | TC6 | 2.90508   | 2       | 180 |
| TC2             | TC4 | TS1 | TC6 | 1.02878   | 2       | 180 |
| TC6             | TS1 | TC4 | TC7 | 0.958873  | 2       | 180 |
| TC6             | TC5 | TC4 | TC7 | 0.322077  | 2       | 180 |
| TC7             | TC4 | TC5 | TH1 | 1.84835   | 2       | 180 |
| TC4             | TC7 | TC8 | TH2 | 2.8056    | 2       | 180 |
| TC4             | TC7 | TC8 | TC8 | 4.50669   | 2       | 180 |
| TC4             | TC7 | TS2 | TC7 | -0.531892 | 2       | 180 |
| !---C1-C2-C4-C5 |     |     |     |           |         |     |
| dihedral        | TC1 | TC2 | TC4 | TC5       | 0.2813  | 1   |
| dihedral        | TC1 | TC2 | TC4 | TC5       | 7.9350  | 2   |
| dihedral        | TC1 | TC2 | TC4 | TC5       | -0.4550 | 3   |
| dihedral        | TC1 | TC2 | TC4 | TC5       | -0.4514 | 4   |
| dihedral        | TC1 | TC2 | TC4 | TS1       | 0       | 0   |
| dihedral        | TC5 | TC4 | TC2 | TN1       | 0       | 0   |
| dihedral        | TS1 | TC4 | TC2 | TN1       | 0       | 0   |
| !---C5-C4-C7-C8 |     |     |     |           |         |     |

```

dihedral TC5 TC4 TC7 TC8 -1.4080 1
dihedral TC5 TC4 TC7 TC8 4.5750 2
dihedral TC5 TC4 TC7 TC8 -0.1908 3
dihedral TC5 TC4 TC7 TC8 -0.4583 4
!---
dihedral TC5 TC4 TC7 TS2 0 0
dihedral TC8 TC7 TC4 TS1 0 0
dihedral TS1 TC4 TC7 TS2 0 0

```

#### NONBONDED

```

!
!V(Lennard-Jones) = Eps,i,j[(Rmin,i,j/ri,j)**12 - !2(Rmin,i,j/ri,j)**6]
!
!epsilon: kcal/mole, Eps,i,j = sqrt(eps,i * eps,j)
!Rmin/2: A, Rmin,i,j = Rmin/2,i + Rmin/2,j
!
!atom ignored epsilon Rmin/2 ignored !eps,1-4 Rmin/2,1-4
TC1 0.0 -0.070 2.00 0.0 -0.0350 1.00
TC2 0.0 -0.070 2.00 0.0 -0.0350 1.00
TC3 0.0 -0.105 2.10 0.0 -0.0525 1.05
TN1 0.0 -0.170 1.82 0.0 -0.0850 0.91
TO1 0.0 -0.210 1.66 0.0 -0.0150 0.83
THN 0.0 -0 0 0.0 -0 0
TC4 0.0 -0.070 2.00 0.0 -0.0350 1.00
TC5 0.0 -0.070 2.00 0.0 -0.0350 1.00
TC6 0.0 -0.070 2.00 0.0 -0.0350 1.00
TS1 0.0 -0.250 2.00 0.0 -0.1250 1.00
TH1 0.0 -0.030 1.36 0.0 -0.0150 0.68
TC7 0.0 -0.070 2.00 0.0 -0.0350 1.00
TC8 0.0 -0.070 2.00 0.0 -0.0350 1.00
TS2 0.0 -0.250 2.00 0.0 -0.1250 1.00
TH2 0.0 -0.030 1.36 0.0 -0.0150 0.68
TH0 0.0 -0.030 1.36 0.0 -0.0150 0.68

```

## 4. DBV force field parameters (CHARMM style)

### Topology

```

MASS 244 DBVTN01 14.00700
MASS 245 DBVTN02 14.00700
MASS 246 DBVTN03 14.00700
MASS 247 DBVTN04 14.00700
MASS 248 DBVTC01 12.01100
MASS 249 DBVTC02 12.01100
MASS 250 DBVTC03 12.01100
MASS 251 DBVTC04 12.01100
MASS 252 DBVTC05 12.01100
MASS 253 DBVTC06 12.01100
MASS 254 DBVTC07 12.01100
MASS 255 DBVTC08 12.01100
MASS 256 DBVTC09 12.01100
MASS 257 DBVTC10 12.01100
MASS 258 DBVTC11 12.01100
MASS 259 DBVTC12 12.01100
MASS 260 DBVTC13 12.01100
MASS 261 DBVTC14 12.01100
MASS 262 DBVTC15 12.01100
MASS 263 DBVC321 12.01100
MASS 264 DBVC202 12.01100

```

MASS 265 DBVTO01 15.99900  
MASS 266 DBVO2D1 15.99900  
MASS 267 DBVO311 15.99900  
MASS 268 DBVTH01 1.008000  
MASS 269 DBVTH02 1.008000  
MASS 270 DBVTH03 1.008000  
MASS 271 DBVTH04 1.008000  
MASS 272 DBVTH05 1.008000  
MASS 273 DBVTH06 1.008000  
MASS 274 DBVHGA2 1.008000  
MASS 275 DBVHGP1 1.008000

RESI DBV 0.000000

GROUP atom type charges

ATOM N01D DBVTN03 -0.583732  
ATOM C01D DBVTC03 0.718919  
ATOM C02D DBVTC01 -0.174674  
ATOM C03D DBVTC02 0.085870  
ATOM C04D DBVTC04 0.179120  
ATOM C05D DBVTC13 0.017959  
ATOM C06D DBVTC15 -0.300772  
ATOM O01D DBVTO01 -0.588453  
ATOM C07D DBVTC05 -0.239748  
ATOM C08D DBVTC14 -0.131542  
ATOM N02D DBVTN02 -0.454160  
ATOM C09D DBVTC06 0.192956  
ATOM C10D DBVTC07 -0.051512  
ATOM C11D DBVTC07 -0.314178  
ATOM C12D DBVTC06 0.218896  
ATOM C13D DBVTC05 -0.223128  
ATOM C14D DBVTC12 0.025193  
ATOM C15D DBVC321 0.389772  
ATOM C16D DBVC321 -0.205699  
ATOM C17D DBVC2O2 0.812602  
ATOM O02D DBVO2D1 -0.627020  
ATOM O03D DBVO311 -0.670431  
ATOM C18D DBVTC10 0.000639  
ATOM N03D DBVTN01 -0.615805  
ATOM C19D DBVTC04 0.256269  
ATOM C20D DBVTC08 -0.215143  
ATOM C21D DBVTC08 -0.012020  
ATOM C22D DBVTC09 0.310537  
ATOM C23D DBVTC12 -0.184231  
ATOM C24D DBVC321 0.162618  
ATOM C25D DBVC321 -0.026651  
ATOM C26D DBVC2O2 0.779233  
ATOM O04D DBVO2D1 -0.624256  
ATOM O05D DBVO311 -0.683230  
ATOM N04D DBVTN04 -0.838752  
ATOM C27D DBVTC11 0.532437  
ATOM C28D DBVTC01 -0.181345  
ATOM C29D DBVTC02 -0.069188  
ATOM C30D DBVTC03 0.786950  
ATOM C31D DBVTC12 0.062221  
ATOM C32D DBVTC14 -0.109923  
ATOM C33D DBVTC15 -0.364920  
ATOM O06D DBVTO01 -0.624420  
ATOM H01D DBVTH06 0.338015  
ATOM H02D DBVTH01 0.013873  
ATOM H03D DBVTH01 0.030853

|                   |           |
|-------------------|-----------|
| ATOM H04D DBVTH01 | 0.030861  |
| ATOM H05D DBVTH02 | 0.152762  |
| ATOM H06D DBVTH02 | 0.147096  |
| ATOM H07D DBVTH04 | 0.126873  |
| ATOM H08D DBVTH02 | 0.132241  |
| ATOM H09D DBVTH05 | 0.361156  |
| ATOM H10D DBVTH04 | 0.219764  |
| ATOM H11D DBVTH01 | 0.018498  |
| ATOM H12D DBVTH01 | 0.008430  |
| ATOM H13D DBVTH01 | -0.001096 |
| ATOM H14D DBVHGA2 | -0.042698 |
| ATOM H15D DBVHGA2 | -0.084127 |
| ATOM H16D DBVHGA2 | 0.083462  |
| ATOM H17D DBVHGA2 | 0.057769  |
| ATOM H18D DBVHGP1 | 0.453554  |
| ATOM H19D DBVTH03 | 0.004438  |
| ATOM H20D DBVTH03 | -0.000224 |
| ATOM H21D DBVTH01 | 0.042799  |
| ATOM H22D DBVTH01 | 0.118778  |
| ATOM H23D DBVTH01 | 0.049510  |
| ATOM H24D DBVHGA2 | -0.004689 |
| ATOM H25D DBVHGA2 | -0.021749 |
| ATOM H26D DBVHGA2 | 0.037126  |
| ATOM H27D DBVHGA2 | 0.019158  |
| ATOM H28D DBVHGP1 | 0.458582  |
| ATOM H29D DBVTH06 | 0.384122  |
| ATOM H30D DBVTH03 | -0.061016 |
| ATOM H31D DBVTH01 | 0.018576  |
| ATOM H32D DBVTH01 | 0.011978  |
| ATOM H33D DBVTH01 | 0.001383  |
| ATOM H34D DBVTH02 | 0.126951  |
| ATOM H35D DBVTH02 | 0.202014  |
| ATOM H36D DBVTH02 | 0.147716  |
| BOND C01D N01D    |           |
| BOND C04D N01D    |           |
| BOND H01D N01D    |           |
| BOND C02D C01D    |           |
| BOND C01D O01D    |           |
| BOND C02D C03D    |           |
| BOND C02D C05D    |           |
| BOND C03D C04D    |           |
| BOND C08D C03D    |           |
| BOND C07D C04D    |           |
| BOND C05D H02D    |           |
| BOND C05D H03D    |           |
| BOND C05D H04D    |           |
| BOND C08D C06D    |           |
| BOND C06D H05D    |           |
| BOND C06D H06D    |           |
| BOND C07D C09D    |           |
| BOND C07D H07D    |           |
| BOND C08D H08D    |           |
| BOND C09D N02D    |           |
| BOND C12D N02D    |           |
| BOND H09D N02D    |           |
| BOND C09D C10D    |           |
| BOND C10D C11D    |           |
| BOND C10D C14D    |           |
| BOND C11D C12D    |           |
| BOND C11D C15D    |           |

BOND C13D C12D  
BOND C13D C19D  
BOND C13D H10D  
BOND C14D H11D  
BOND C14D H12D  
BOND C14D H13D  
BOND C15D C16D  
BOND C15D H14D  
BOND C15D H15D  
BOND C17D C16D  
BOND C16D H16D  
BOND C16D H17D  
BOND C17D O02D  
BOND C17D O03D  
BOND H18D O03D  
BOND C22D C18D  
BOND C18D C27D  
BOND C18D H19D  
BOND C18D H20D  
BOND C19D N03D  
BOND C22D N03D  
BOND C19D C20D  
BOND C20D C21D  
BOND C20D C24D  
BOND C21D C22D  
BOND C21D C23D  
BOND C23D H21D  
BOND C23D H22D  
BOND C23D H23D  
BOND C24D C25D  
BOND C24D H24D  
BOND C24D H25D  
BOND C26D C25D  
BOND C25D H26D  
BOND C25D H27D  
BOND C26D O04D  
BOND C26D O05D  
BOND H28D O05D  
BOND C27D N04D  
BOND C30D N04D  
BOND H29D N04D  
BOND C28D C27D  
BOND C27D H30D  
BOND C28D C29D  
BOND C28D C31D  
BOND C29D C30D  
BOND C29D C32D  
BOND C30D O06D  
BOND C31D H31D  
BOND C31D H32D  
BOND C31D H33D  
BOND C32D C33D  
BOND C32D H34D  
BOND C33D H35D  
BOND C33D H36D  
IMPR C17D C16D O02D O03D  
IMPR C26D C25D O04D O05D

## Parameters

BONDS

!

!V(bond) = Kb(b - b0)\*\*2

!

!Kb: kcal/mole/A\*\*2

!b0: A

!

| !atom   | type    | Kb      | b0      |
|---------|---------|---------|---------|
| DBVTC03 | DBVTN03 | 345.725 | 1.41232 |
| DBVTC03 | DBVTO01 | 847.729 | 1.23164 |
| DBVTC01 | DBVTC03 | 234.289 | 1.47262 |
| DBVTC01 | DBVTC02 | 440.926 | 1.35985 |
| DBVTC01 | DBVTC18 | 454.801 | 1.34006 |
| DBVTC01 | DBVTC13 | 275.398 | 1.47574 |
| DBVTC02 | DBVTC04 | 209.5   | 1.45218 |
| DBVTC04 | DBVTN03 | 369.511 | 1.40969 |
| DBVTC13 | DBVTH01 | 340.576 | 1.09602 |
| DBVTC15 | DBVTH02 | 389.597 | 1.08481 |
| DBVTC04 | DBVTC05 | 465.707 | 1.36449 |
| DBVTC17 | DBVTC16 | 451.662 | 1.36215 |
| DBVTC05 | DBVTC06 | 255.926 | 1.40409 |
| DBVTC16 | DBVTC06 | 275.157 | 1.4038  |
| DBVTC05 | DBVTH04 | 363.398 | 1.09119 |
| DBVTC16 | DBVTH04 | 414.187 | 1.09214 |
| DBVTC02 | DBVTC14 | 274.541 | 1.42248 |
| DBVTC18 | DBVTC14 | 282.044 | 1.405   |
| DBVTC14 | DBVTC15 | 620.679 | 1.33577 |
| DBVTC14 | DBVTH02 | 383.363 | 1.08992 |
| DBVTC06 | DBVTN02 | 403.783 | 1.37147 |
| DBVTC06 | DBVTC07 | 258.778 | 1.38403 |
| DBVTC07 | DBVTC07 | 326.092 | 1.40869 |
| DBVTC07 | DBVTC12 | 274.655 | 1.49729 |
| DBVC321 | DBVTC07 | 244.149 | 1.47744 |
| DBVTC12 | DBVTH01 | 314.878 | 1.09757 |
| DBVC321 | DBVC321 | 230.41  | 1.54475 |
| DBVC321 | DBVHGA2 | 322.001 | 1.09654 |
| DBVC2O2 | DBVC321 | 205.582 | 1.56848 |
| DBVC2O2 | DBVO2D1 | 750     | 1.22    |
| DBVC2O2 | DBVO311 | 230     | 1.4     |
| DBVTC10 | DBVTC11 | 154.42  | 1.48052 |
| DBVTC10 | DBVTH03 | 350.476 | 1.09544 |
| DBVTC17 | DBVTN01 | 316.237 | 1.4075  |
| DBVTC17 | DBVTC08 | 259.011 | 1.47415 |
| DBVTC08 | DBVTC08 | 484.273 | 1.34951 |
| DBVC321 | DBVTC08 | 217.434 | 1.46106 |
| DBVTC08 | DBVTC09 | 275.671 | 1.4394  |
| DBVTC08 | DBVTC12 | 300.017 | 1.48788 |
| DBVTC09 | DBVTC10 | 246.167 | 1.47658 |
| DBVTC09 | DBVTN01 | 527.432 | 1.3124  |
| DBVTC11 | DBVTN04 | 283.172 | 1.45175 |
| DBVTC11 | DBVTH03 | 329.942 | 1.10364 |
| DBVTC01 | DBVTC11 | 202.948 | 1.50658 |
| DBVTC01 | DBVTC12 | 600.202 | 1.45953 |
| DBVTC18 | DBVTC03 | 193.861 | 1.46276 |
| DBVTC03 | DBVTN04 | 439.917 | 1.39671 |
| DBVTH06 | DBVTN03 | 533.029 | 1.01041 |
| DBVTH05 | DBVTN02 | 412.703 | 1.0145  |
| DBVHGP1 | DBVO311 | 545     | 0.96    |

DBVTH06 DBVTN04 452.506 1.01952

ANGLES

!

!V(angle) = Ktheta(Theta - Theta0)\*\*2

!

!Ktheta: kcal/mole/rad\*\*2

!Theta0: degrees

!

| Atom types              | Ktheta  | Theta0  |  |  |
|-------------------------|---------|---------|--|--|
| DBVTC05 DBVTC04 DBVTN03 | 56.9663 | 135.075 |  |  |
| DBVTC02 DBVTC04 DBVTN03 | 71.6942 | 109.321 |  |  |
| DBVTN03 DBVTC03 DBVTO01 | 83.6574 | 144.081 |  |  |
| DBVTC01 DBVTC03 DBVTN03 | 59.5321 | 118.575 |  |  |
| DBVTC03 DBVTC01 DBVTC13 | 42.5618 | 122.017 |  |  |
| DBVTC02 DBVTC01 DBVTC03 | 77.6048 | 108.632 |  |  |
| DBVTC03 DBVTN03 DBVTH06 | 36.682  | 115.121 |  |  |
| DBVTC03 DBVTN03 DBVTC04 | 88.121  | 104.04  |  |  |
| DBVTC01 DBVTC13 DBVTH01 | 42.3268 | 107.515 |  |  |
| DBVTC01 DBVTC02 DBVTC14 | 44.2434 | 123.716 |  |  |
| DBVTC01 DBVTC18 DBVTC14 | 38.8387 | 117.638 |  |  |
| DBVTC01 DBVTC02 DBVTC04 | 82.6551 | 113.47  |  |  |
| DBVTC01 DBVTC03 DBVTO01 | 45.7026 | 153.573 |  |  |
| DBVTC02 DBVTC14 DBVTH02 | 35.4987 | 121.493 |  |  |
| DBVTC18 DBVTC14 DBVTH02 | 35.088  | 120.885 |  |  |
| DBVTC02 DBVTC14 DBVTC15 | 45.2858 | 125.062 |  |  |
| DBVTC18 DBVTC14 DBVTC15 | 42.9597 | 120.279 |  |  |
| DBVTC02 DBVTC04 DBVTC05 | 27.9423 | 115.09  |  |  |
| DBVTC02 DBVTC01 DBVTC13 | 44.6834 | 123.971 |  |  |
| DBVTC04 DBVTC05 DBVTH04 | 37.3272 | 119.829 |  |  |
| DBVTC17 DBVTC16 DBVTH04 | 34.3461 | 124.313 |  |  |
| DBVTC04 DBVTC05 DBVTC06 | 40.3259 | 131.921 |  |  |
| DBVTC17 DBVTC16 DBVTC06 | 48.7466 | 131.129 |  |  |
| DBVTC04 DBVTC02 DBVTC14 | 27.1764 | 116.809 |  |  |
| DBVTC04 DBVTN03 DBVTH06 | 33.2986 | 112.899 |  |  |
| DBVTC15 DBVTC14 DBVTH02 | 33.4038 | 127.183 |  |  |
| DBVTC16 DBVTC06 DBVTC07 | 25.1173 | 101.866 |  |  |
| DBVTC05 DBVTC06 DBVTC07 | 34.5616 | 130.965 |  |  |
| DBVTC05 DBVTC06 DBVTN02 | 45.7496 | 119.845 |  |  |
| DBVTC16 DBVTC06 DBVTN02 | 58.6695 | 124.119 |  |  |
| DBVTC14 DBVTC15 DBVTH02 | 36.9603 | 122.76  |  |  |
| DBVTC07 DBVTC06 DBVTN02 | 78.2882 | 108.667 |  |  |
| DBVTC06 DBVTC07 DBVTC12 | 42.5268 | 121.142 |  |  |
| DBVTC06 DBVTC07 DBVTC07 | 87.8062 | 111.976 |  |  |
| DBVTC06 DBVTN02 DBVTH05 | 34.8733 | 108.805 |  |  |
| DBVTC06 DBVTN02 DBVTC06 | 77.574  | 103.319 |  |  |
| DBVTC06 DBVTC05 DBVTH04 | 33.5471 | 116.761 |  |  |
| DBVTC06 DBVTC16 DBVTH04 | 31.5335 | 120.969 |  |  |
| DBVTC07 DBVTC12 DBVTH01 | 44.3337 | 107.034 |  |  |
| DBVC321 DBVTC07 DBVTC07 | 45.6275 | 121.123 |  |  |
| DBVHGA2 DBVC321 DBVTC07 | 43.9081 | 109.656 |  |  |
| DBVC321 DBVC321 DBVTC07 | 50.8    | 109.119 |  |  |
| DBVTC07 DBVTC07 DBVTC12 | 32.9371 | 125.366 |  |  |
| DBVC321 DBVTC07 DBVTC06 | 36.6388 | 100.711 |  |  |
| DBVTC16 DBVTC17 DBVTC08 | 35.4027 | 124.329 |  |  |
| DBVTC16 DBVTC17 DBVTN01 | 41.4499 | 124.655 |  |  |
| DBVC321 DBVC321 DBVHGA2 | 26.5    | 110.1   |  |  |
| DBVC2O2 DBVC321 DBVC321 | 52      | 108     |  |  |
| DBVC321 DBVC2O2 DBVO311 | 55      | 110.5   |  |  |
| DBVC321 DBVC2O2 DBVO2D1 | 70      | 125     |  |  |

DBVC2O2 DBVO311 DBVHGP1 55 115  
 DBVC2O2 DBVC321 DBVHGA2 33 109.5  
 DBVO2D1 DBVC2O2 DBVO311 50 123  
 DBVTC10 DBVTC11 DBVTH03 35.0933 102.66  
 DBVTC01 DBVTC11 DBVTC10 43.3532 105.118  
 DBVTC10 DBVTC11 DBVTN04 62.5371 107.085  
 DBVTC08 DBVTC09 DBVTC10 43.7164 119.95  
 DBVTC10 DBVTC09 DBVTN01 45.0304 134.619  
 DBVTC08 DBVTC09 DBVTN01 91.1912 113.652  
 DBVTC08 DBVTC17 DBVTN01 95.5814 109.737  
 DBVC321 DBVTC08 DBVTC17 37.5008 129.858  
 DBVTC17 DBVTC08 DBVTC08 71.41 104.614  
 DBVTC17 DBVTN01 DBVTC09 105.322 101.535  
 DBVHGA2 DBVC321 DBVTC08 44.11 107.912  
 DBVC321 DBVC321 DBVTC08 64.5401 110.695  
 DBVTC08 DBVTC08 DBVTC12 42.4562 122.198  
 DBVTC08 DBVTC08 DBVTC09 62.6181 103.427  
 DBVTC08 DBVTC12 DBVTH01 49.5578 106.143  
 DBVC321 DBVTC08 DBVTC08 51.1856 117.491  
 DBVTC09 DBVTC08 DBVTC12 38.2748 120.631  
 DBVTC09 DBVTC10 DBVTH03 38.7813 108.007  
 DBVTC09 DBVTC10 DBVTC11 48.2673 104.641  
 DBVTN04 DBVTC03 DBVTO01 87.8105 145.36  
 DBVTC18 DBVTC03 DBVTN04 54.5223 125.364  
 DBVTH03 DBVTC11 DBVTN04 51.9943 105.806  
 DBVTC01 DBVTC11 DBVTN04 96.7902 98.1747  
 DBVTC11 DBVTC01 DBVTC12 43.1125 131.421  
 DBVTC18 DBVTC01 DBVTC11 63.8423 112.08  
 DBVTC11 DBVTN04 DBVTH06 30.6421 104.15  
 DBVTC03 DBVTN04 DBVTC11 76.4826 103.684  
 DBVTC11 DBVTC10 DBVTH03 39.2563 106.51  
 DBVTC01 DBVTC12 DBVTH01 46.2739 108.605  
 DBVTC01 DBVTC18 DBVTC03 88.3219 105.779  
 DBVTC01 DBVTC11 DBVTH03 37.2692 103.641  
 DBVTC18 DBVTC03 DBVTO01 50.9505 149.849  
 DBVTC18 DBVTC01 DBVTC12 44.2373 132.13  
 DBVTC03 DBVTC18 DBVTC14 32.2641 104.141  
 DBVTC03 DBVTN04 DBVTH06 41.8896 113.418  
 DBVTH01 DBVTC13 DBVTH01 37.5682 105.232  
 DBVTH02 DBVTC15 DBVTH02 23.2317 122.647  
 DBVTH01 DBVTC12 DBVTH01 39.646 102.308  
 DBVHGA2 DBVC321 DBVHGA2 35.5234 106.93  
 DBVTH03 DBVTC10 DBVTH03 35.7938 109.05

#### DIHEDRALS

!

!V(dihedral) = Kchi(1 + cos(n(chi) - delta))

!

!Kchi: kcal/mole

!n: multiplicity

!delta: degrees

!

| !atom types                     | Kchi     | n | delta   |
|---------------------------------|----------|---|---------|
| DBVTN03 DBVTC04 DBVTC02 DBVTC01 | -19.7238 | 2 | 180     |
| DBVTN03 DBVTC04 DBVTC02 DBVTC14 | 4.36735  | 2 | 123.848 |
| DBVTN03 DBVTC04 DBVTC05 DBVTC06 | 3.62498  | 2 | 178.268 |
| DBVTN03 DBVTC04 DBVTC05 DBVTH04 | 6.9772   | 2 | 172.248 |
| DBVTN03 DBVTC03 DBVTC01 DBVTC02 | -2.93453 | 2 | 180     |
| DBVTN03 DBVTC03 DBVTC01 DBVTC13 | 3.80405  | 2 | 180     |
| DBVTC03 DBVTC01 DBVTC02 DBVTC04 | 30.0337  | 2 | 180     |

|         |         |         |         |           |   |          |
|---------|---------|---------|---------|-----------|---|----------|
| DBVTC03 | DBVTC01 | DBVTC02 | DBVTC14 | 6.46987   | 2 | 180      |
| DBVTC03 | DBVTC01 | DBVTC13 | DBVTH01 | 0.0265139 | 3 | 26.3294  |
| DBVTC03 | DBVTN03 | DBVTC04 | DBVTC02 | 23.8501   | 2 | 171.469  |
| DBVTC03 | DBVTN03 | DBVTC04 | DBVTC05 | 2.54525   | 2 | 203.129  |
| DBVTC01 | DBVTC02 | DBVTC04 | DBVTC05 | 1.73714   | 2 | 159.87   |
| DBVTC04 | DBVTC02 | DBVTC14 | DBVTC15 | 0.976226  | 2 | 173.067  |
| DBVTC01 | DBVTC02 | DBVTC14 | DBVTC15 | 0.715736  | 2 | 197.18   |
| DBVTC01 | DBVTC18 | DBVTC14 | DBVTC15 | 0.265964  | 2 | 175.219  |
| DBVTC01 | DBVTC02 | DBVTC14 | DBVTH02 | 1.02669   | 2 | 150.547  |
| DBVTC01 | DBVTC18 | DBVTC14 | DBVTH02 | 0.76808   | 2 | 200.258  |
| DBVTC01 | DBVTC03 | DBVTN03 | DBVTC04 | 2.00293   | 2 | 52.5094  |
| DBVTC01 | DBVTC03 | DBVTN03 | DBVTH06 | 2.83239   | 2 | 202.165  |
| DBVTC02 | DBVTC14 | DBVTC15 | DBVTH02 | 4.79507   | 2 | 180      |
| DBVTC18 | DBVTC14 | DBVTC15 | DBVTH02 | 5.39753   | 2 | 180      |
| DBVTC02 | DBVTC04 | DBVTN03 | DBVTH06 | 1.82638   | 2 | 149.674  |
| DBVTC02 | DBVTC04 | DBVTC05 | DBVTC06 | 4.658     | 2 | 180      |
| DBVTC02 | DBVTC04 | DBVTC05 | DBVTH04 | 2.96319   | 2 | 180      |
| DBVTC02 | DBVTC01 | DBVTC03 | DBVTO01 | 0.592848  | 2 | 180      |
| DBVTC02 | DBVTC01 | DBVTC13 | DBVTH01 | -0.086657 | 3 | -26.229  |
| DBVTC04 | DBVTC05 | DBVTC06 | DBVTN02 | 3.60644   | 2 | 220.224  |
| DBVTC17 | DBVTC16 | DBVTC06 | DBVTN02 | 2.556     | 2 | 229.299  |
| DBVTC04 | DBVTC05 | DBVTC06 | DBVTC07 | -0.900395 | 2 | 140.921  |
| DBVTC17 | DBVTC16 | DBVTC06 | DBVTC07 | 1.17956   | 2 | 149.261  |
| DBVTC04 | DBVTC02 | DBVTC01 | DBVTC13 | 5.90175   | 2 | 180      |
| DBVTC04 | DBVTC02 | DBVTC14 | DBVTH02 | 1.20718   | 2 | 186.557  |
| DBVTC04 | DBVTN03 | DBVTC03 | DBVTO01 | 4.66209   | 2 | 181.896  |
| DBVTC13 | DBVTC01 | DBVTC03 | DBVTO01 | 1.57589   | 2 | 180      |
| DBVTC13 | DBVTC01 | DBVTC02 | DBVTC14 | 3.20166   | 2 | 180      |
| DBVTO01 | DBVTC03 | DBVTN03 | DBVTH06 | 1.11463   | 2 | 171.008  |
| DBVTC05 | DBVTC06 | DBVTN02 | DBVTC06 | 7.26468   | 2 | 180      |
| DBVTC16 | DBVTC06 | DBVTN02 | DBVTC06 | 5.75384   | 2 | 180      |
| DBVTC05 | DBVTC06 | DBVTN02 | DBVTH05 | 2.97875   | 2 | 169.106  |
| DBVTC16 | DBVTC06 | DBVTN02 | DBVTH05 | 2.04184   | 2 | 172.554  |
| DBVTC05 | DBVTC06 | DBVTC07 | DBVTC07 | 2.38744   | 2 | 180      |
| DBVTC16 | DBVTC06 | DBVTC07 | DBVTC07 | 1.09828   | 2 | 180      |
| DBVTC05 | DBVTC06 | DBVTC07 | DBVTC12 | 1.50918   | 2 | 180      |
| DBVTC05 | DBVTC04 | DBVTN03 | DBVTH06 | 0.918345  | 2 | -87.6742 |
| DBVTC05 | DBVTC04 | DBVTC02 | DBVTC14 | 4.14048   | 2 | 246.963  |
| DBVTN02 | DBVTC06 | DBVTC07 | DBVTC07 | 11.4039   | 2 | 180      |
| DBVTN02 | DBVTC06 | DBVTC07 | DBVC321 | 2.87276   | 2 | 180      |
| DBVTN02 | DBVTC06 | DBVTC05 | DBVTH04 | 1.59464   | 2 | 180      |
| DBVTN02 | DBVTC06 | DBVTC16 | DBVTH04 | 3.6182    | 2 | 180      |
| DBVTN02 | DBVTC06 | DBVTC07 | DBVTC12 | 5.77505   | 2 | 200.793  |
| DBVTC06 | DBVTC07 | DBVTC07 | DBVTC06 | 0.568221  | 2 | 180      |
| DBVTC06 | DBVTC07 | DBVTC07 | DBVC321 | 5.49041   | 2 | 180      |
| DBVTC06 | DBVTC07 | DBVTC12 | DBVTH01 | 0.320305  | 3 | 483.233  |
| DBVTC06 | DBVTN02 | DBVTC06 | DBVTC07 | 7.27348   | 2 | 180      |
| DBVTC07 | DBVTC07 | DBVC321 | DBVC321 | 3.19867   | 3 | 140.542  |
| DBVTC07 | DBVTC07 | DBVC321 | DBVHGA2 | 0.751077  | 3 | 50.3226  |
| DBVTC07 | DBVTC06 | DBVTC05 | DBVTH04 | 1.52891   | 2 | 177.076  |
| DBVTC07 | DBVTC06 | DBVTC16 | DBVTH04 | 2.10275   | 2 | 220.366  |
| DBVTC07 | DBVTC06 | DBVTN02 | DBVTH05 | 2.92506   | 2 | 186.511  |
| DBVTC07 | DBVC321 | DBVC321 | DBVC2O2 | 0.195     | 3 | 0        |
| DBVTC07 | DBVC321 | DBVC321 | DBVHGA2 | 0.195     | 3 | 0        |
| DBVTC07 | DBVTC07 | DBVTC12 | DBVTH01 | -0.17068  | 3 | -1.01558 |
| DBVTC06 | DBVTC16 | DBVTC17 | DBVTN01 | 3.28649   | 2 | 180      |
| DBVTC06 | DBVTC16 | DBVTC17 | DBVTC08 | 4.55264   | 2 | 180      |
| DBVTC06 | DBVTC07 | DBVTC07 | DBVTC12 | 4.51194   | 2 | 224.737  |
| DBVTC06 | DBVTC07 | DBVC321 | DBVC321 | 5.12656   | 3 | -41.4933 |
| DBVTC06 | DBVTC07 | DBVC321 | DBVHGA2 | 0.927607  | 3 | -126.157 |

|         |         |         |         |            |   |          |
|---------|---------|---------|---------|------------|---|----------|
| DBVTC16 | DBVTC17 | DBVTN01 | DBVTC09 | 2.38619    | 2 | 180      |
| DBVTC16 | DBVTC17 | DBVTC08 | DBVTC08 | 0.773602   | 2 | 180      |
| DBVTC16 | DBVTC17 | DBVTC08 | DBVC321 | 0.269602   | 2 | 180      |
| DBVTC16 | DBVTC06 | DBVTC07 | DBVC321 | 2.94333    | 2 | 180      |
| DBVTC12 | DBVTC07 | DBVTC07 | DBVC321 | 1.82264    | 2 | 180      |
| DBVC321 | DBVC321 | DBVC2O2 | DBVO2D1 | 0.05       | 3 | 0        |
| DBVC321 | DBVC321 | DBVC2O2 | DBVO311 | 0.53       | 2 | 180      |
| DBVC321 | DBVC2O2 | DBVO311 | DBVHGP1 | 2.05       | 2 | 180      |
| DBVC2O2 | DBVC321 | DBVC321 | DBVHGA2 | 0.195      | 3 | 0        |
| DBVO2D1 | DBVC2O2 | DBVC321 | DBVHGA2 | 0          | 3 | 0        |
| DBVO2D1 | DBVC2O2 | DBVO311 | DBVHGP1 | 2.05       | 2 | 180      |
| DBVO311 | DBVC2O2 | DBVC321 | DBVHGA2 | 0          | 3 | 180      |
| DBVTC10 | DBVTC11 | DBVTN04 | DBVTC03 | 1.43853    | 3 | -247.668 |
| DBVTC10 | DBVTC11 | DBVTN04 | DBVTH06 | 0.350316   | 3 | -4.15766 |
| DBVTC10 | DBVTC11 | DBVTC01 | DBVTC18 | -1.795     | 3 | -68.401  |
| DBVTC10 | DBVTC11 | DBVTC01 | DBVTC12 | 0.698846   | 3 | -55.4296 |
| DBVTC10 | DBVTC09 | DBVTN01 | DBVTC17 | 6.64298    | 2 | 180      |
| DBVTC10 | DBVTC09 | DBVTC08 | DBVTC08 | -0.0883436 | 2 | 180      |
| DBVTC10 | DBVTC09 | DBVTC08 | DBVTC12 | 3.24772    | 2 | 180      |
| DBVTN01 | DBVTC09 | DBVTC10 | DBVTC11 | 1.03824    | 3 | -176.642 |
| DBVTN01 | DBVTC09 | DBVTC10 | DBVTH03 | 0.24855    | 3 | -20.8917 |
| DBVTN01 | DBVTC09 | DBVTC08 | DBVTC08 | 5.27333    | 2 | 180      |
| DBVTN01 | DBVTC09 | DBVTC08 | DBVTC12 | 4.41929    | 2 | 180      |
| DBVTN01 | DBVTC17 | DBVTC16 | DBVTH04 | 5.06546    | 2 | 180      |
| DBVTN01 | DBVTC17 | DBVTC08 | DBVTC08 | -1.99961   | 2 | 180      |
| DBVTN01 | DBVTC17 | DBVTC08 | DBVC321 | 2.65494    | 2 | 180      |
| DBVTC17 | DBVTC08 | DBVTC08 | DBVTC09 | 19.0142    | 2 | 180      |
| DBVTC17 | DBVTC08 | DBVTC08 | DBVTC12 | 4.9139     | 2 | 180      |
| DBVTC17 | DBVTC08 | DBVC321 | DBVC321 | 3.77536    | 3 | -115.472 |
| DBVTC17 | DBVTC08 | DBVC321 | DBVHGA2 | 0.846632   | 3 | 18.9507  |
| DBVTC17 | DBVTN01 | DBVTC09 | DBVTC08 | 7.73293    | 2 | 180      |
| DBVTC08 | DBVC321 | DBVC321 | DBVC2O2 | 0.195      | 3 | 0        |
| DBVTC08 | DBVC321 | DBVC321 | DBVHGA2 | 0.195      | 3 | 0        |
| DBVTC08 | DBVTC08 | DBVTC12 | DBVTH01 | 0.197789   | 3 | 261.855  |
| DBVTC08 | DBVTC17 | DBVTC16 | DBVTH04 | 3.5316     | 2 | 180      |
| DBVTC08 | DBVTC17 | DBVTN01 | DBVTC09 | 16.9094    | 2 | 180      |
| DBVTC08 | DBVTC09 | DBVTC10 | DBVTC11 | 2.08916    | 3 | 57.8861  |
| DBVTC08 | DBVTC09 | DBVTC10 | DBVTH03 | 0.795633   | 3 | 51.0688  |
| DBVTC08 | DBVTC08 | DBVC321 | DBVC321 | 4.25414    | 3 | 71.786   |
| DBVTC08 | DBVTC08 | DBVC321 | DBVHGA2 | 0.667872   | 3 | 140.149  |
| DBVTC09 | DBVTC08 | DBVTC08 | DBVC321 | 4.42144    | 2 | 180      |
| DBVTC09 | DBVTC08 | DBVTC12 | DBVTH01 | 0.120725   | 3 | 22.3857  |
| DBVTC09 | DBVTC10 | DBVTC11 | DBVTN04 | 2.48384    | 3 | 8.96658  |
| DBVTC09 | DBVTC10 | DBVTC11 | DBVTC01 | -4.26999   | 3 | -77.1944 |
| DBVTC09 | DBVTC10 | DBVTC11 | DBVTH03 | 0.468432   | 3 | 47.3634  |
| DBVTC12 | DBVTC08 | DBVTC08 | DBVC321 | 1.85824    | 2 | 180      |
| DBVTN04 | DBVTC03 | DBVTC18 | DBVTC01 | 0.372138   | 2 | 180      |
| DBVTN04 | DBVTC03 | DBVTC18 | DBVTC14 | 1.02539    | 2 | 180      |
| DBVTN04 | DBVTC11 | DBVTC10 | DBVTH03 | -0.595391  | 3 | -89.765  |
| DBVTN04 | DBVTC11 | DBVTC01 | DBVTC18 | 3.28538    | 3 | -118.928 |
| DBVTN04 | DBVTC11 | DBVTC01 | DBVTC12 | 1.53613    | 3 | 128.3    |
| DBVTC11 | DBVTC01 | DBVTC18 | DBVTC03 | 13.6535    | 2 | 180      |
| DBVTC11 | DBVTC01 | DBVTC18 | DBVTC14 | 8.02488    | 2 | 180      |
| DBVTC11 | DBVTC01 | DBVTC12 | DBVTH01 | 0.223909   | 3 | -1.14578 |
| DBVTC11 | DBVTN04 | DBVTC03 | DBVTC18 | 6.63711    | 2 | 180      |
| DBVTC11 | DBVTN04 | DBVTC03 | DBVTO01 | 6.21054    | 2 | 191.852  |
| DBVTC01 | DBVTC18 | DBVTC03 | DBVTO01 | 0.883499   | 2 | 267.929  |
| DBVTC01 | DBVTC11 | DBVTC10 | DBVTH03 | 1.13395    | 3 | -37.9283 |
| DBVTC01 | DBVTC11 | DBVTN04 | DBVTC03 | 2.08849    | 3 | -154     |
| DBVTC01 | DBVTC11 | DBVTN04 | DBVTH06 | 0.279066   | 3 | -32.8653 |

DBVTC18 DBVTC03 DBVTN04 DBVTH06 3.62673 2 186.57  
 DBVTC18 DBVTC01 DBVTC11 DBVTH03 1.52792 3 70.7487  
 DBVTC18 DBVTC01 DBVTC12 DBVTH01 0.100756 3 -213.411  
 DBVTC03 DBVTC18 DBVTC01 DBVTC12 8.92411 2 180  
 DBVTC03 DBVTC18 DBVTC14 DBVTC15 1.49456 2 181.554  
 DBVTC03 DBVTC18 DBVTC14 DBVTH02 0.760186 2 159.592  
 DBVTC03 DBVTN04 DBVTC11 DBVTH03 1.3352 3 -121.713  
 DBVTC12 DBVTC01 DBVTC11 DBVTH03 -0.23958 3 -34.9148  
 DBVTC12 DBVTC01 DBVTC18 DBVTC14 3.90534 2 180  
 DBVTC14 DBVTC18 DBVTC03 DBVTO01 1.40851 2 180  
 DBVTO01 DBVTC03 DBVTN04 DBVTH06 1.76067 2 192.413  
 DBVTH02 DBVTC15 DBVTC14 DBVTH02 5.26304 2 180  
 DBVHGA2 DBVC321 DBVC321 DBVHGA2 0.22 3 0  
 DBVTH03 DBVTC10 DBVTC11 DBVTH03 0.224431 3 63.9842  
 DBVTH06 DBVTN04 DBVTC11 DBVTH03 0.347083 3 -10.0499

IMPROPER

!  
 !V(improper) = Kpsi(psi - psi0)\*\*2  
 !  
 !Kpsi: kcal/mole/rad\*\*2  
 !psi0: degrees  
 !note that the second column of numbers (0) is ignored  
 !  

|                                 |      |      |   |  |  |
|---------------------------------|------|------|---|--|--|
| !atom types                     | Kpsi | psi0 |   |  |  |
| DBVC2O2 DBVC321 DBVO2D1 DBVO311 | 65   | 0    | 0 |  |  |

NONBONDED

!  
 !V(Lennard-Jones) = Eps,i,j[(Rmin,i,j/ri,j)\*\*12 - !2(Rmin,i,j/ri,j)\*\*6]  
 !  
 !epsilon: kcal/mole, Eps,i,j = sqrt(eps,i \* eps,j)  
 !Rmin/2: A, Rmin,i,j = Rmin/2,i + Rmin/2,j  
 !  

|               |             |        |             |          |            |
|---------------|-------------|--------|-------------|----------|------------|
| !atom ignored | epsilon     | Rmin/2 | ignored     | !eps,1-4 | Rmin/2,1-4 |
| DBVTN03       | 0.0 -0.2    | 1.8500 | 0.0 -0.2    | 1.8500   |            |
| DBVTC03       | 0.0 -0.02   | 1.2000 | 0.0 -0.02   | 1.2000   |            |
| DBVTC01       | 0.0 -0.05   | 2.1000 | 0.0 -0.05   | 2.1000   |            |
| DBVTC02       | 0.0 -0.05   | 2.1000 | 0.0 -0.05   | 2.1000   |            |
| DBVTC18       | 0.0 -0.05   | 2.1000 | 0.0 -0.05   | 2.1000   |            |
| DBVTC04       | 0.0 -0.05   | 2.1000 | 0.0 -0.05   | 2.1000   |            |
| DBVTC17       | 0.0 -0.05   | 2.1000 | 0.0 -0.05   | 2.1000   |            |
| DBVTC13       | 0.0 -0.078  | 2.0500 | 0.0 -0.078  | 2.0500   |            |
| DBVTC15       | 0.0 -0.064  | 2.0800 | 0.0 -0.064  | 2.0800   |            |
| DBVTO01       | 0.0 -0.12   | 1.7000 | 0.0 -0.12   | 1.7000   |            |
| DBVTC05       | 0.0 -0.068  | 2.0900 | 0.0 -0.068  | 2.0900   |            |
| DBVTC16       | 0.0 -0.068  | 2.0900 | 0.0 -0.068  | 2.0900   |            |
| DBVTC14       | 0.0 -0.068  | 2.0900 | 0.0 -0.068  | 2.0900   |            |
| DBVTN02       | 0.0 -0.2    | 1.8500 | 0.0 -0.2    | 1.8500   |            |
| DBVTC06       | 0.0 -0.05   | 2.1000 | 0.0 -0.05   | 2.1000   |            |
| DBVTC07       | 0.0 -0.05   | 2.1000 | 0.0 -0.05   | 2.1000   |            |
| DBVTC12       | 0.0 -0.078  | 2.0500 | 0.0 -0.078  | 2.0500   |            |
| DBVC321       | 0.0 -0.056  | 2.0100 | 0.0 -0.056  | 2.0100   |            |
| DBVC2O2       | 0.0 -0.098  | 1.7000 | 0.0 -0.098  | 1.7000   |            |
| DBVO2D1       | 0.0 -0.12   | 1.7000 | 0.0 -0.12   | 1.7000   |            |
| DBVO311       | 0.0 -0.1921 | 1.7650 | 0.0 -0.1921 | 1.7650   |            |
| DBVTC10       | 0.0 -0.056  | 2.0100 | 0.0 -0.056  | 2.0100   |            |
| DBVTN01       | 0.0 -0.2    | 1.8500 | 0.0 -0.2    | 1.8500   |            |
| DBVTC08       | 0.0 -0.05   | 2.1000 | 0.0 -0.05   | 2.1000   |            |

|         |     |        |        |     |        |        |
|---------|-----|--------|--------|-----|--------|--------|
| DBVTC09 | 0.0 | -0.02  | 2.2000 | 0.0 | -0.02  | 2.2000 |
| DBVTN04 | 0.0 | -0.2   | 1.8500 | 0.0 | -0.2   | 1.8500 |
| DBVTC11 | 0.0 | -0.036 | 2.0100 | 0.0 | -0.036 | 2.0100 |
| DBVTH06 | 0.0 | -0.046 | 0.2245 | 0.0 | -0.046 | 0.2245 |
| DBVTH01 | 0.0 | -0.024 | 1.3400 | 0.0 | -0.024 | 1.3400 |
| DBVTH02 | 0.0 | -0.026 | 1.2600 | 0.0 | -0.026 | 1.2600 |
| DBVTH04 | 0.0 | -0.031 | 1.2500 | 0.0 | -0.031 | 1.2500 |
| DBVTH05 | 0.0 | -0.046 | 0.2245 | 0.0 | -0.046 | 0.2245 |
| DBVHGA2 | 0.0 | -0.035 | 1.3400 | 0.0 | -0.035 | 1.3400 |
| DBVHGP1 | 0.0 | -0.046 | 0.2245 | 0.0 | -0.046 | 0.2245 |
| DBVTH03 | 0.0 | -0.035 | 1.3400 | 0.0 | -0.035 | 1.3400 |
